# Supplementary material
Source: publisher figshare collection journal article supplement (https://diabetesjournals.figshare.com/articles/dataset/_/18551261)
Supplement: Supplementary file 1 [file 1]

The ENDIA Study Group:

Investigators: Simon C Barry, Maria E Craig, Peter G Colman, Jennifer J Couper, Elizabeth A Davis, Mark Harris, Leonard C Harrison, Aveni Haynes, Ki Wook Kim, Grant Morahan, Helena Oakey, Megan A S Penno, William D Rawlinson, Richard O Sinnott, Georgia Soldatos, Rebecca L Thomson, Peter J Vuillermin, John M Wentworth.

Project, Data and Biospecimen Managers: Amanda J Anderson, Pat Ashwood, James D Brown, William Hu, Dao Huynh, Kelly J McGorm.

Clinical scientists: Kelly Watson, Yeon Park.

Associate investigators: Emma Hamilton-Williams.

Coordinators: Sarah Beresford, Samantha Bertram, Debra Bezuidenhout, Susan Brandrick, Carlie Butterworth, Jacki Catteau, Nakita Clements, Kyana Gartrell, Helen Griffiths, Alison Gwiazdzinski, Candice Hall, Gail Harper, Amanda Hulley, Mikayla Hoffman, Renee Kludas, Christine Monagle, Belinda Moore, Benjamin Ramoso, Alison Roberts, Georgina Thompson, Alexandra Tully, Isabelle Vicary, Rosemary Wood.

Dietitians: Rachel Battersby, Teela Jullie, Stephanie Savio. Post-doctoral Fellows: Esther Bandala Sanchez, Naiara Bediaga, Chris Hope, Tim Sadlon, Alexandra Roth Schulze.

Research Officers: Sabrina Binkowski, Bek Brittain, Minh Bui, Dylan Foscett, Dexing Huang, Stuti Kapadia, Asma Minhaj, Gaetano Naselli, Katrina Ngui, Trung Nguyen, Emily Wood, Cynthia Yau.

Administrator: Leanne Cavenett.
