# Supplementary material
Source: publisher figshare collection journal article supplement (https://diabetesjournals.figshare.com/articles/dataset/_/18551261)
Supplement: Supplementary file 2 [file 1]

The ENDIA Study Group would like to thank the following additional institutions and individuals for their contribution to ENDIA recruitment and follow-up: Flinders Medical Centre, SA (Brian Coppin), Royal Women's Hospital, Vic (Alison Nankervis), Ballarat Base Hospital, Vic (David Song), Bendigo Health, Vic (Mark Savage), Mercy Hospital for Women, Vic (Christine Houlihan), Sunshine Hospital, Vic (Joan Kirner), St Vincent's Hospital, Vic (Balasubramanian Krishnamurthy), Werribee Mercy Hospital, Vic (Sheetal Tipnis). Royal Brisbane and Women's Hospital (Michael d'Emden), Wesley Hospital, Qld (Stephen Cook, Andrew Cotterill). Royal Darwin Hospital (Louise Maple-Brown). Referring Physicians in Private: Natalie Harrison/Geelong Diabetes & Endocrinology (Vic), Dorothy Graham (WA), Linda McKendrick (SA), AmandaTerry (SA).
